# Supplementary material
Source: Springer Nature journal article supplement (https://www.springermedizin.de/resource/supplementary/12883_2010_431_MOESM1_ESM.pdf/9455426)

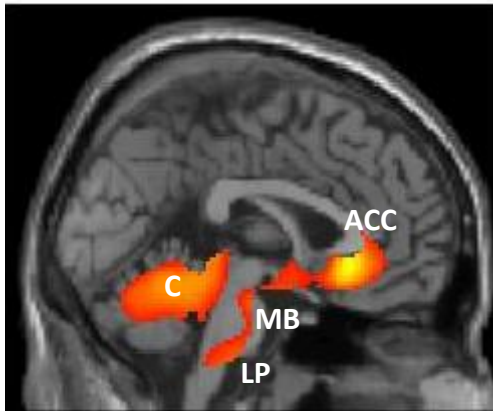

Midline (X= 5)

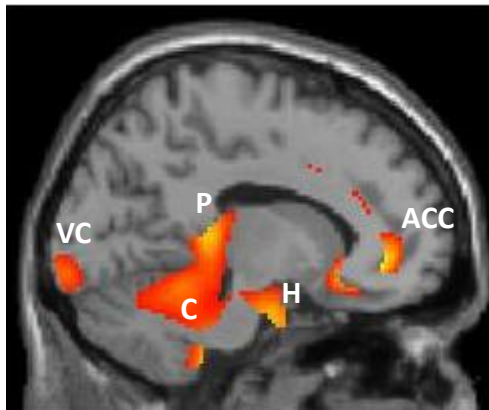

Left (X= -12)

Z score

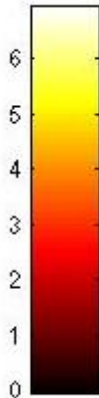

Supplement: MOESM1 [file 9455426]
